# Supplementary material
Source: PubMed Central journal article supplement (PMC4187811)
Supplement: IAI.01608-14_zii999090827so1.pdf [file IAI.01608-14_zii999090827so1.pdf]

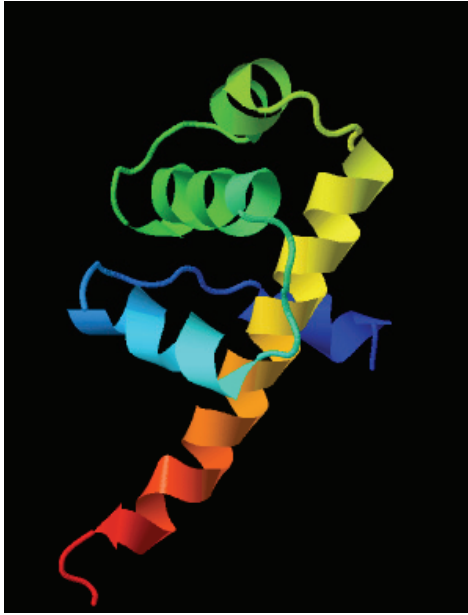

**TosR**

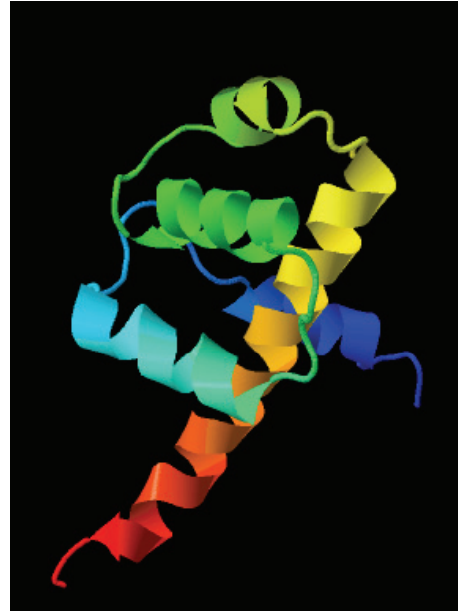

**PapB**

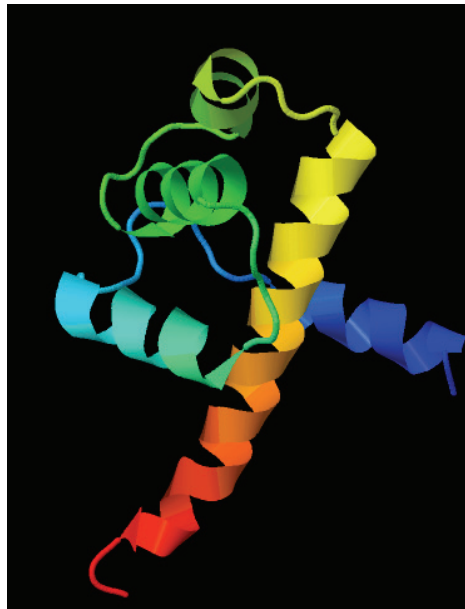

**FocB**

**Figure S1. Predicted structures of PapB family homologs.** Phyre<sup>2</sup> models based off of the amino acid sequences of TosR and PapB are indicated (both modeled against FocB with 100% confidence). The previously solved structure of FocB, which was used to model TosR and PapB is also depicted.
